# Supplementary material for: PIASy antagonizes Ras-driven NSCLC survival by promoting GATA2 SUMOylation
Source: PubMed Central journal article supplement — J Cancer. 2018 Apr 18;9(9):1689–97. doi: 10.7150/jca.24137 (PMC5950599; doi:10.7150/jca.24137), 2018-04-18
Supplement: jcav09p1689s1.pdf [file jcav09p1689s1.pdf]

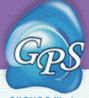

The CUCKOO Workgroup

# GPS-SUMO Prediction of SUMOylation Sites & SUMO-binding Motifs

Version 2.0

THE CUCKOO WORKGROUP

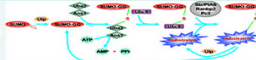

- HOME
- DOWNLOAD
- WEB SERVER
- DATABASE
- CITATION
- USER GUIDE
- LINKS
- CONTACT

## PRODUCTS OF CUCKOO

+ PTMs Predictor

+ Tools

+ Databases

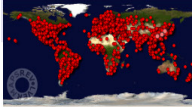

✧ GPS-SUMO Online Service

xls Download Visualize Return

Result has 2 items!

| ID                                      | Position | Peptide         | Score  | Cutoff | P-value | Type                  |
|-----------------------------------------|----------|-----------------|--------|--------|---------|-----------------------|
| AAH18988.1 GATA2 protein [Homo sapiens] | 222      | VSLTESMKMESSGFL | 14.205 | 3.24   | 0.009   | Sumoylation Consensus |
| AAH18988.1 GATA2 protein [Homo sapiens] | 375      | VNRPLTMRKGGIQR  | 15.131 | 3.24   | 0.006   | Sumoylation Consensus |
